# Supplementary material
Source: PubMed Central journal article supplement (PMC4894472)

# Figure S1.

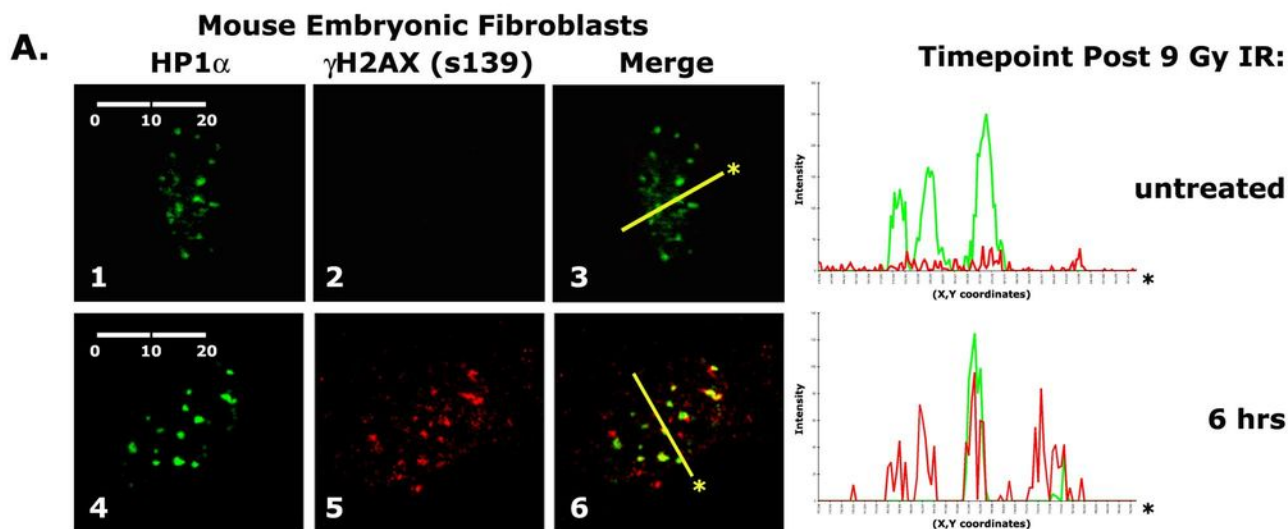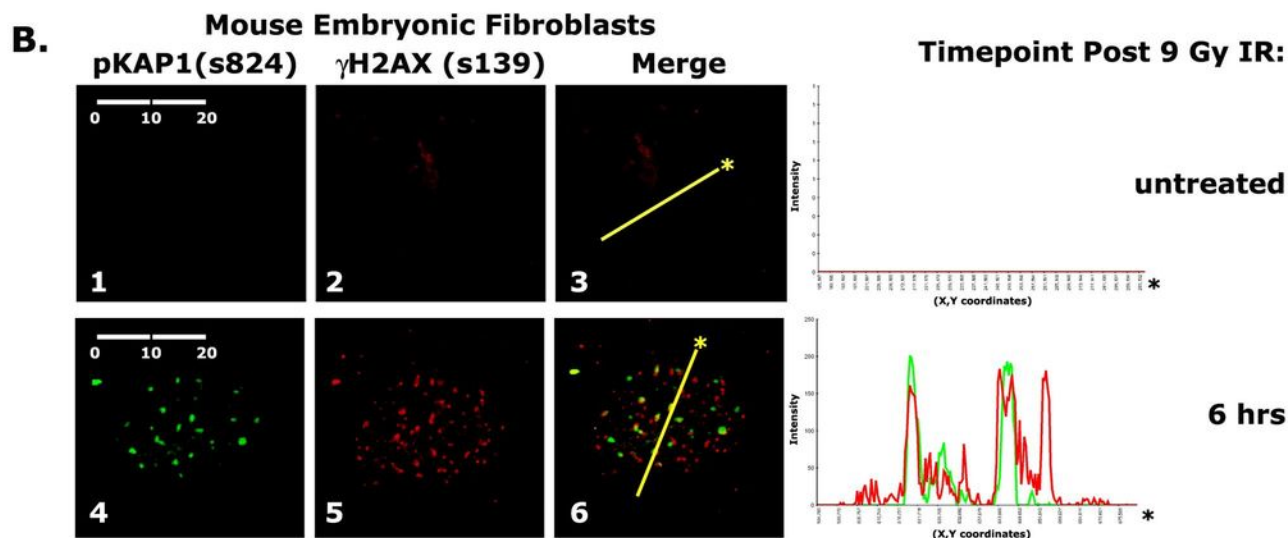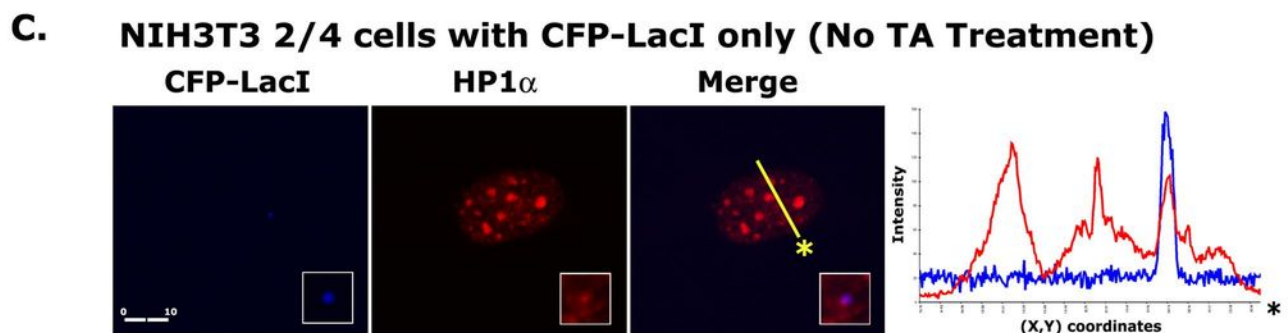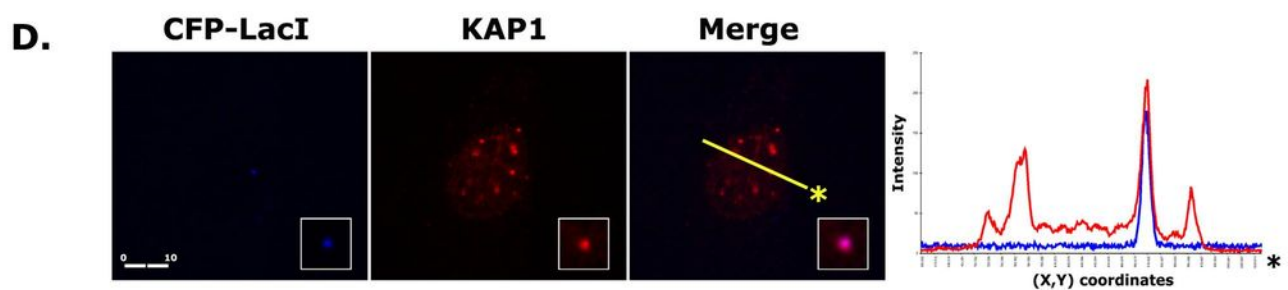

Supplement: NIHMS52701-supplement-S1.pdf [file NIHMS52701-supplement-S1.pdf]

# Figure S2.

## A.

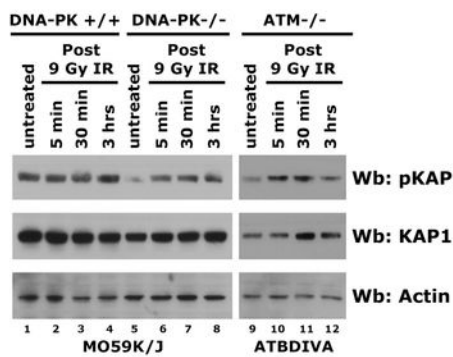

## B.

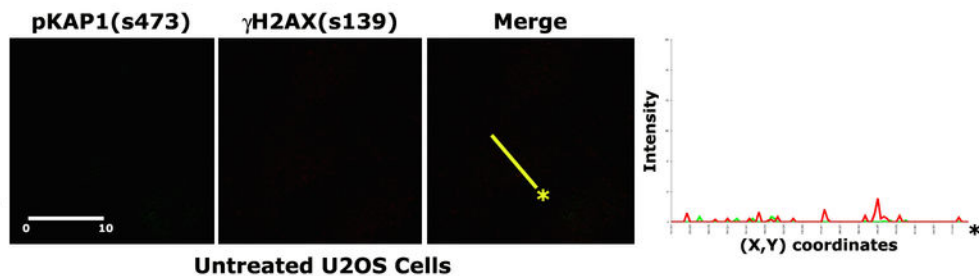

## C. NIH3T3 2/4 cells + YFP-SceI-GR (3hrs Post TA Treatment)

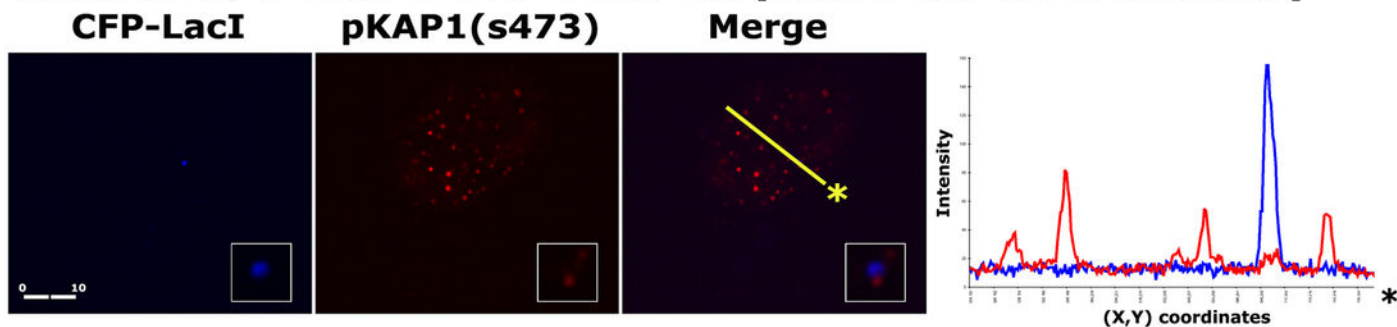

## D.

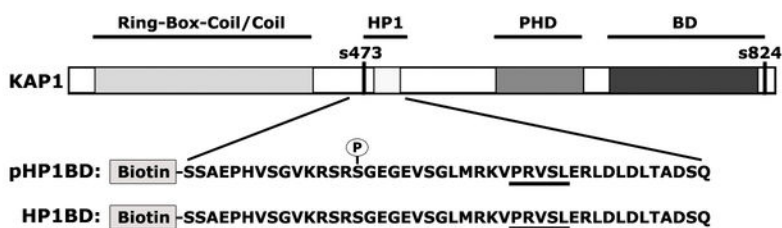

## E.

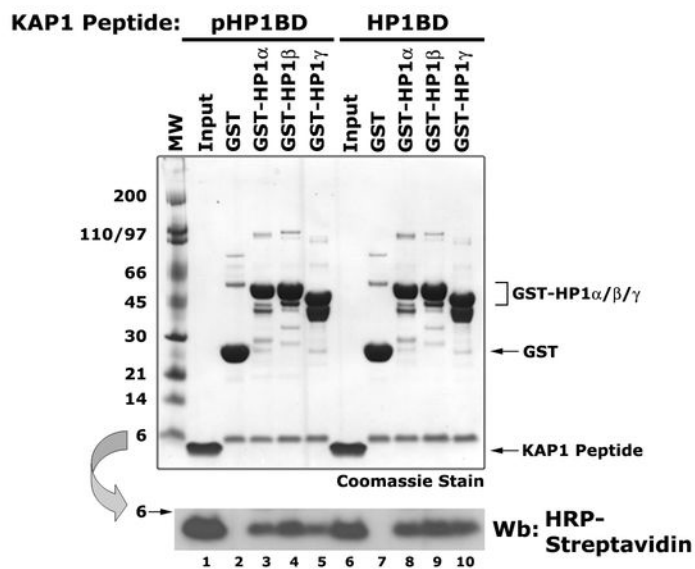

## F.

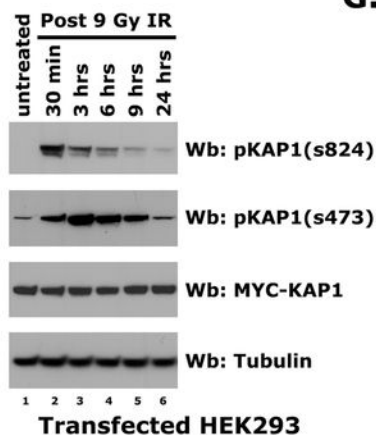

## G.

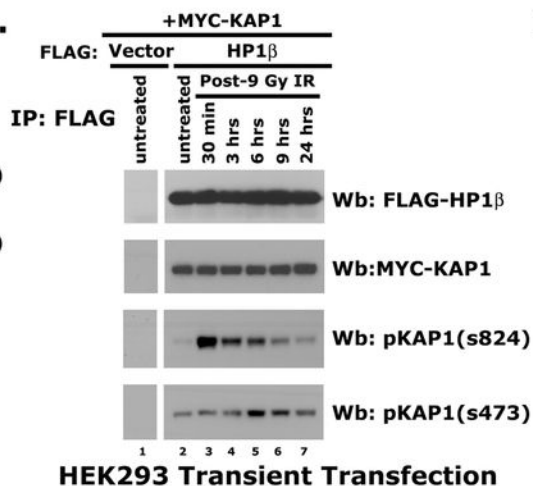

## H.

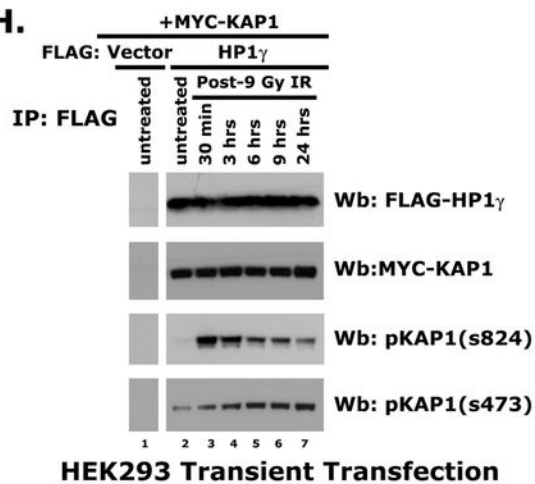

Supplement: NIHMS52701-supplement-S2.pdf [file NIHMS52701-supplement-S2.pdf]

**Figure S3.**

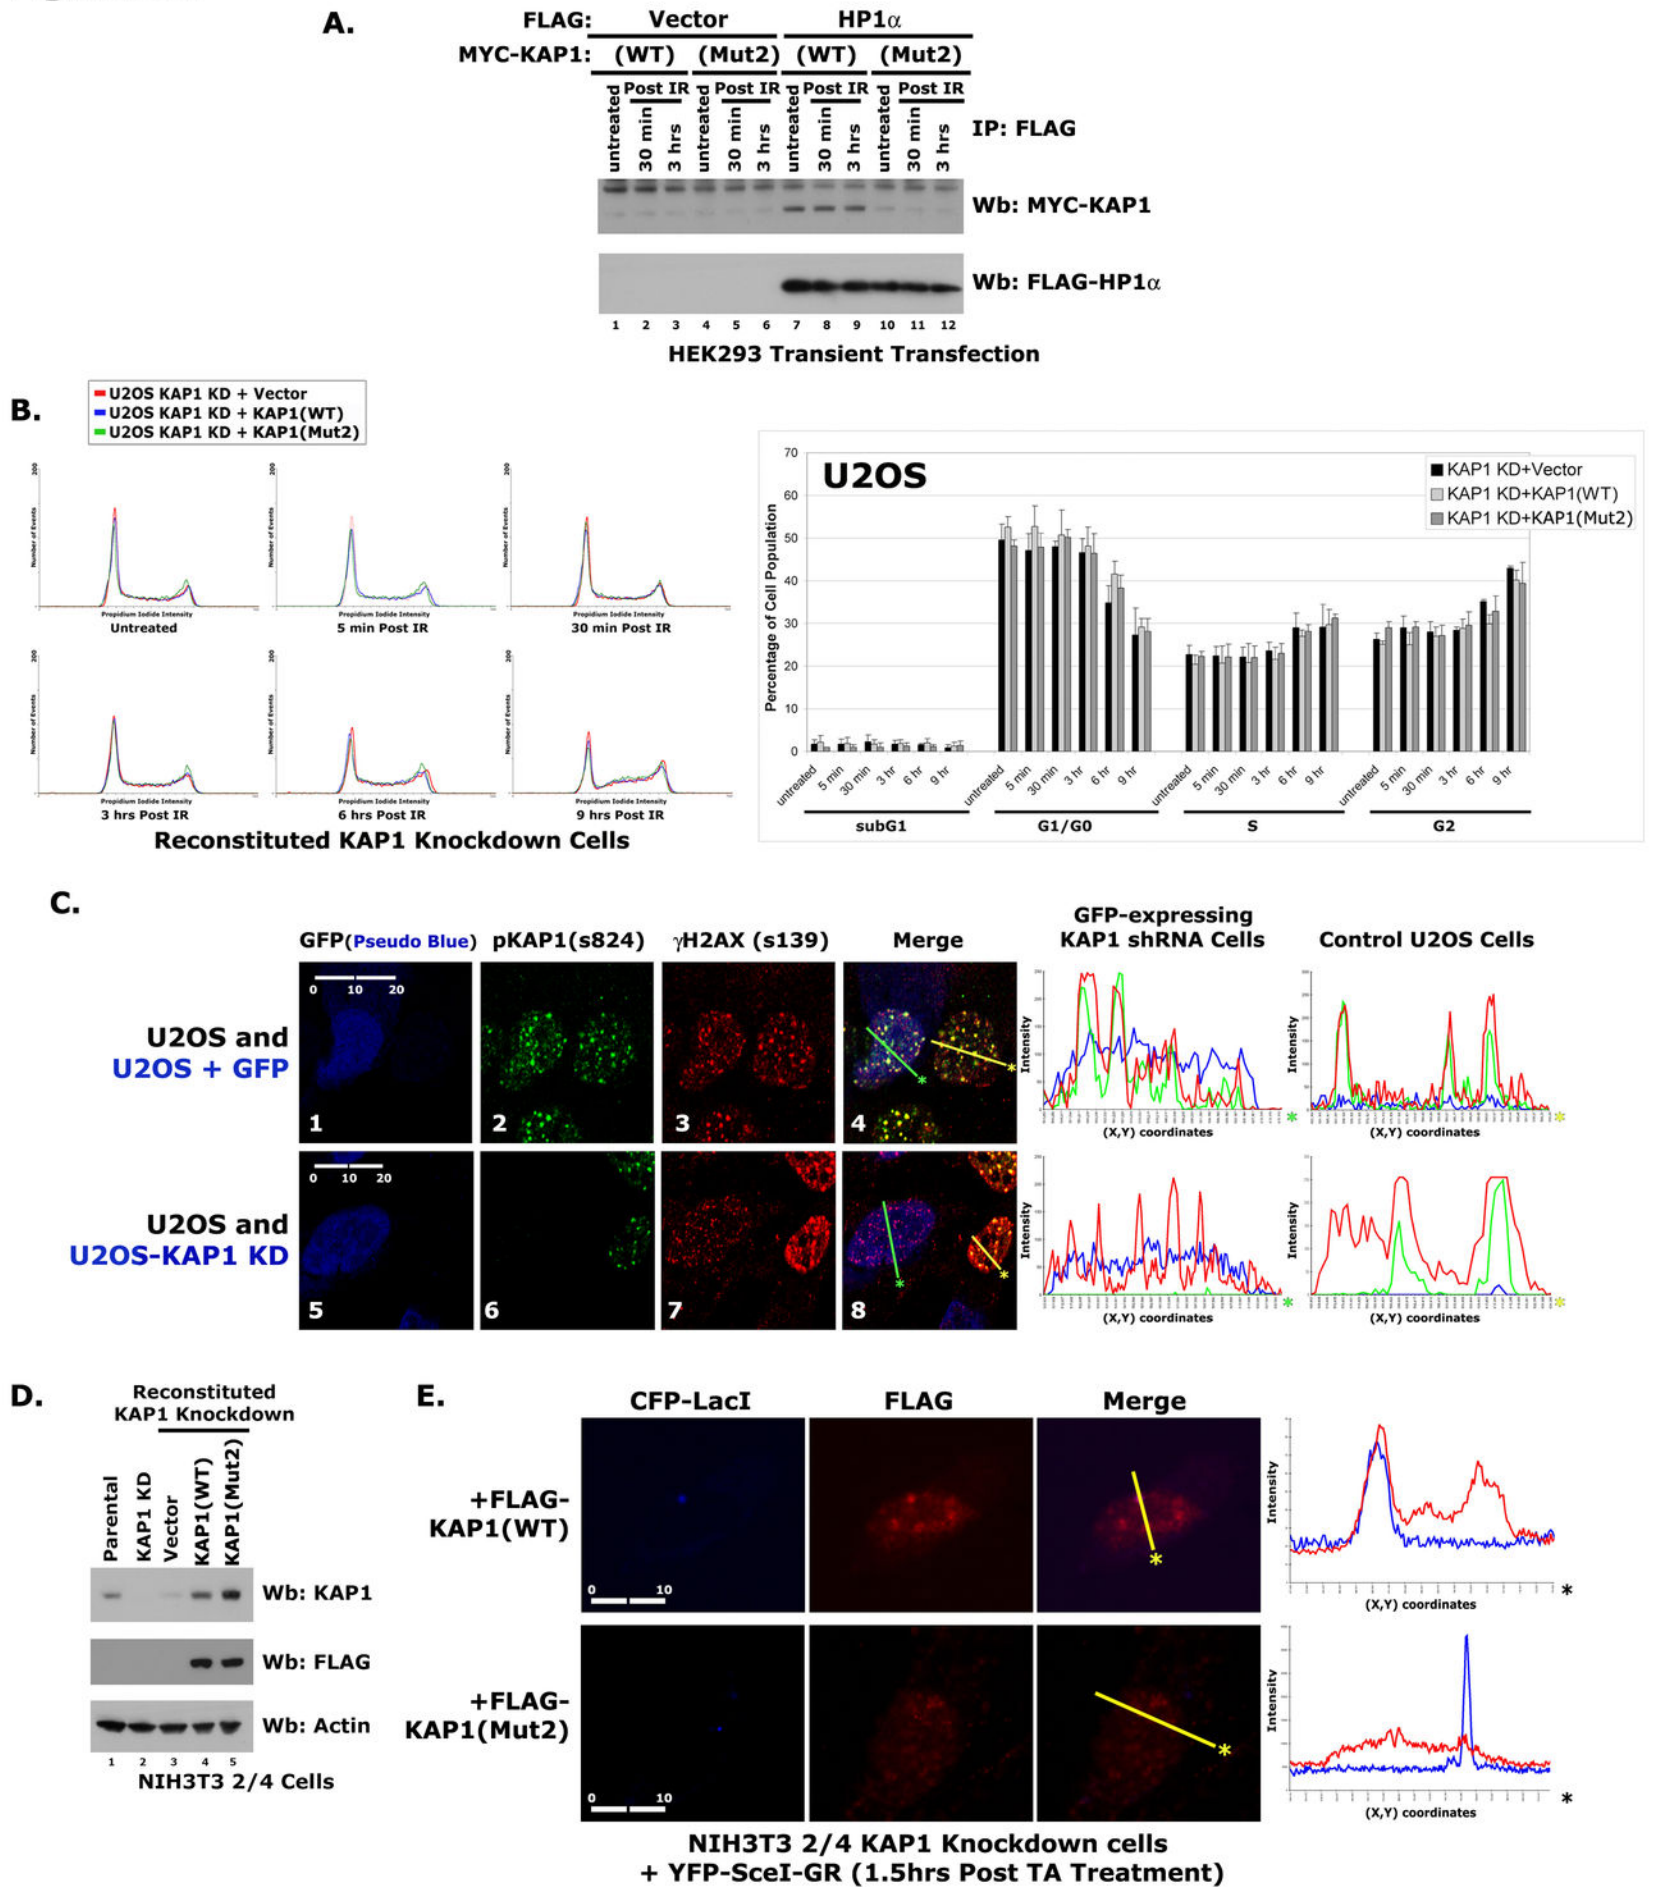

Supplement: NIHMS52701-supplement-S3.pdf [file NIHMS52701-supplement-S3.pdf]
